# Supplementary material for: A Blockchain Framework for Patient-Centered Health Records and Exchange (HealthChain): Evaluation and Proof-of-Concept Study
Source: PubMed Central journal article supplement (PMC6743266; doi:10.2196/13592), 2019-08-31
Supplement: jmir_v21i8e13592_app2.pdf [file jmir_v21i8e13592_app2.pdf]

## Multimedia Appendix 2

### Experimental Configurations

HealthChain has four configurable modes, but not all are relevant to certain measures; hence, results list two-, three-, or four-letter abbreviations. Herein, an overview of the modes (Table 1) and abbreviations (Tables 2-5) are presented.

Table 1. Mode definitions and configuration options.

| Mode                   | Option 1                                                                                                                                  | Option 2                                                                                                   |
|------------------------|-------------------------------------------------------------------------------------------------------------------------------------------|------------------------------------------------------------------------------------------------------------|
| Block encryption       | <b>A:</b> AES-encrypted data with a PRE-encrypted key                                                                                     | <b>P:</b> Proxy re-encryption (PRE) encrypted data                                                         |
| Storage                | <b>F:</b> Full-block – all data stored in a single block                                                                                  | <b>I:</b> Incremental – each new entry is a new record                                                     |
| Encryption key         | <b>S:</b> Static – one key for the life of the block                                                                                      | <b>D:</b> Dynamic – a new key for each action                                                              |
| Server-side encryption | <b>Y:</b> Yes – server encrypts its data using an ephemeral key in dynamic mode for each entry following the chosen block encryption mode | <b>N:</b> No – server does not encrypt its data (note: the data are still encrypted under the users' keys) |

Table 2. Two-letter abbreviations: excludes key encryption and server-side encryption.

| Abbr | Block Enc | Storage     | Experiments                                                                                                                            |
|------|-----------|-------------|----------------------------------------------------------------------------------------------------------------------------------------|
| AF   | AES+PRE   | Full Block  | <b>Network latency (server-to-client):</b> <i>Block encryption</i> determines cipher size. <i>Storage</i> accounts for cipher padding. |
| AI   | AES+PRE   | Incremental |                                                                                                                                        |
| PF   | PRE       | Full Block  |                                                                                                                                        |
| PI   | PRE       | Incremental |                                                                                                                                        |

Table 3. Three-letter abbreviations: excludes server-side encryption.

| Abbr | Block Enc | Enc Key | Storage     | Experiments                                                                                                                                                                                                                                                                                                                                                                                         |
|------|-----------|---------|-------------|-----------------------------------------------------------------------------------------------------------------------------------------------------------------------------------------------------------------------------------------------------------------------------------------------------------------------------------------------------------------------------------------------------|
| ADF  | AES+PRE   | Dynamic | Full Block  | <b>Transmission size/network latency (client-to-sever):</b> <i>Block encryption</i> affects cipher size. <i>Dynamic encryption keys</i> bloat transactions with updated smart contracts, scalars, and keys. <i>Storage</i> accounts for cipher padding.<br><b>Client processing time:</b> <i>Block encryption</i> impacts performance. <i>Encryption key</i> determines rekeying and smart contract |
| ADI  | AES+PRE   | Dynamic | Incremental |                                                                                                                                                                                                                                                                                                                                                                                                     |
| ASF  | AES+PRE   | Static  | Full Block  |                                                                                                                                                                                                                                                                                                                                                                                                     |
| ASI  | AES+PRE   | Static  | Incremental |                                                                                                                                                                                                                                                                                                                                                                                                     |
| PDF  | PRE       | Dynamic | Full Block  |                                                                                                                                                                                                                                                                                                                                                                                                     |
| PDI  | PRE       | Dynamic | Incremental |                                                                                                                                                                                                                                                                                                                                                                                                     |
| PSF  | PRE       | Static  | Full Block  |                                                                                                                                                                                                                                                                                                                                                                                                     |
| PSI  | PRE       | Static  | Incremental |                                                                                                                                                                                                                                                                                                                                                                                                     |

|  |  |  |  |                                                                          |
|--|--|--|--|--------------------------------------------------------------------------|
|  |  |  |  | regeneration. <i>Storage</i> affects the amount of data to be processed. |
|--|--|--|--|--------------------------------------------------------------------------|

Table 4. Three-letter abbreviations: excludes encryption key mode.

| Abbr | Block Enc | Storage     | Server Enc | Experiments                                                                                                                                                                                                                                                                         |
|------|-----------|-------------|------------|-------------------------------------------------------------------------------------------------------------------------------------------------------------------------------------------------------------------------------------------------------------------------------------|
| AFN  | AES+PRE   | Full Block  | No         | <b>Smart contract execution:</b> <i>Block encryption</i> impacts performance. <i>Storage</i> affects the number of records to be decrypted. <i>Server-side encryption</i> impacts performance as a value of Y requires each record to first be decrypted by a unique ephemeral key. |
| AFY  | AES+PRE   | Full Block  | Yes        |                                                                                                                                                                                                                                                                                     |
| AIN  | AES+PRE   | Incremental | No         |                                                                                                                                                                                                                                                                                     |
| AIY  | AES+PRE   | Incremental | Yes        |                                                                                                                                                                                                                                                                                     |
| PFN  | PRE       | Full Block  | No         |                                                                                                                                                                                                                                                                                     |
| PFY  | PRE       | Full Block  | Yes        |                                                                                                                                                                                                                                                                                     |
| PIN  | PRE       | Incremental | No         |                                                                                                                                                                                                                                                                                     |
| PIY  | PRE       | Incremental | Yes        |                                                                                                                                                                                                                                                                                     |

Table 5. Four-letter abbreviations.

| Abbr | Block Enc | Enc Key | Storage     | Server Enc | Experiments                                                                                                                                                                                                                                                                                                                             |
|------|-----------|---------|-------------|------------|-----------------------------------------------------------------------------------------------------------------------------------------------------------------------------------------------------------------------------------------------------------------------------------------------------------------------------------------|
| ADFN | AES+PRE   | Dynamic | Full Block  | No         | <b>Server processing time:</b> <i>Block encryption</i> has a significant impact on performance. <i>Encryption key</i> determines rekeying. <i>Storage</i> affects the amount of data to be processed. <i>Server-side encryption</i> impacts performance as a value of Y requires each record to be encrypted by a unique ephemeral key. |
| ADFY | AES+PRE   | Dynamic | Full Block  | Yes        |                                                                                                                                                                                                                                                                                                                                         |
| ADIN | AES+PRE   | Dynamic | Incremental | No         |                                                                                                                                                                                                                                                                                                                                         |
| ADIY | AES+PRE   | Dynamic | Incremental | Yes        |                                                                                                                                                                                                                                                                                                                                         |
| ASFN | AES+PRE   | Static  | Full Block  | No         |                                                                                                                                                                                                                                                                                                                                         |
| ASFY | AES+PRE   | Static  | Full Block  | Yes        |                                                                                                                                                                                                                                                                                                                                         |
| ASIN | AES+PRE   | Static  | Incremental | No         |                                                                                                                                                                                                                                                                                                                                         |
| ASIY | AES+PRE   | Static  | Incremental | Yes        |                                                                                                                                                                                                                                                                                                                                         |
| PDFN | PRE       | Dynamic | Full Block  | No         |                                                                                                                                                                                                                                                                                                                                         |
| PDFY | PRE       | Dynamic | Full Block  | Yes        |                                                                                                                                                                                                                                                                                                                                         |
| PDIN | PRE       | Dynamic | Incremental | No         |                                                                                                                                                                                                                                                                                                                                         |
| PDIY | PRE       | Dynamic | Incremental | Yes        |                                                                                                                                                                                                                                                                                                                                         |
| PSFN | PRE       | Static  | Full Block  | No         |                                                                                                                                                                                                                                                                                                                                         |
| PSFY | PRE       | Static  | Full Block  | Yes        |                                                                                                                                                                                                                                                                                                                                         |
| PSIN | PRE       | Static  | Incremental | No         |                                                                                                                                                                                                                                                                                                                                         |
| PSIY | PRE       | Static  | Incremental | Yes        |                                                                                                                                                                                                                                                                                                                                         |
